# Supplementary material for: Eradication of Pseudomonas aeruginosa in cystic fibrosis patients with inhalation of dry powder tobramycin
Source: PubMed Central journal article supplement — Ther Adv Respir Dis. 2020 Feb 11;14:1753466620905279. doi: 10.1177/1753466620905279 (PMC7016310; doi:10.1177/1753466620905279), 2020-02-11
Supplement: Reviewer_1_v.1.pdf [file Reviewer_1_v.1.pdf]

Comments to the Author

General:

The manuscript reports the findings of a retrospective study to evaluate the efficacy of inhaled tobramycin aerosols generated with a nebulizer or dry powder inhaler on the eradication of *Pseudomonas aeruginosa* from adult CF patients. In general the manuscript is easy to follow and the conclusion is supported by the results of the study. Although the authors acknowledge the limitations of the study and its findings due to the small sample size, there are a few details missing that would allow a better evaluation of the findings of the study. In addition, the manuscript will benefit from a thorough revision of grammar.

Specific comments:

1. Page 4, lines 20-21: Please replace "less time consuming" with "reduced administration time".
2. Page 4, line 21: Please replace "when disposable" with "when used with a disposable inhaler".
3. Page 4, line 22: Please replace "To our best knowledge" with "To the best of our knowledge".
4. Page 4, "Methods section": Please include the model and make of the nebulizer(s) and the DPI(s) that were used by the 13 patients included in the study, and if available, the particle or droplet size.
5. Page 4, "Methods section": Please include the doses of tobramycin used with the DPI and the nebulizer (nominal dose and time of treatment).
6. Page 5, lines 2-3: If possible, please also include the doses of the oral ciprofloxacin and IV tobramycin used.
7. Page 5, second paragraph, last sentence: Are authors referring at statistical differences between the nebulized vs. dry powder groups or nebulized alone versus nebulized plus oral ciprofloxacin patient?
8. Page 5, lines 36-37. Please rephrase this sentence, as it is difficult to understand its meaning in its current form.
9. Page 9, Table 2: Please add that the age is in years.
