# Supplementary material for: Eradication of Pseudomonas aeruginosa in cystic fibrosis patients with inhalation of dry powder tobramycin
Source: PubMed Central journal article supplement — Ther Adv Respir Dis. 2020 Feb 11;14:1753466620905279. doi: 10.1177/1753466620905279 (PMC7016310; doi:10.1177/1753466620905279), 2020-02-11
Supplement: Reviewer_2_v.1.pdf [file Reviewer_2_v.1.pdf]

Reviewer 2 v.1

Reviewer Comments – Rebecca A Griffith, MD for manuscript:

“Eradication of *Pseudomonas aeruginosa* in CF patient with inhalation of dry powder tobramycin”

Summary:

- Addresses an important question in CF care- CFF has posed the question of optimal eradication therapy and this may help to spur further research in that area
- Methods and results are well written and logical, easy to follow
- Discussion is nice summary of eradication as well as acknowledging imitations. I especially think concluding statement is clear and instructive on next steps

No Major issues

Minor issues:

In background section: might benefit from reference or more clarification of statement of advantages of dry powder vs nebulization [2nd paragraph, end of 6th line]

Methods: I think section would flow better if last 2 sentences were flipped- i.e. Primary outcome statement is at end of paragraph and Medical ethics declaration as last sentence in new paragraph

Results: Would be easier to follow if had a graphic- for example a Figure as a flowchart which walks through initial prose and could graphically follow numbers of those included and the excluded patients with reasons- is limit to figures- this could be possibly be combined with inclusion/exclusion criteria

Rest of results are clear- would be helpful to have table if possible

Discussion: as mentioned I think is supportive of study and clear
