# Supplementary material for: Eradication of Pseudomonas aeruginosa in cystic fibrosis patients with inhalation of dry powder tobramycin
Source: PubMed Central journal article supplement — Ther Adv Respir Dis. 2020 Feb 11;14:1753466620905279. doi: 10.1177/1753466620905279 (PMC7016310; doi:10.1177/1753466620905279), 2020-02-11
Supplement: Reviewer_3_v.1.pdf [file Reviewer_3_v.1.pdf]

Reviewer 3 v.1

Comments to the Author

The case presented is very interesting in pulmonary field an CF disease and the case is well described. The study demonstrated the tobramycin inhalation powder equally efficacious to tobramycin liquid nebulisation and is associated with increased patient convenience. However I strongly suggest, if possible, to insert details on the formulation and inhaler device employed in the study. It is know that the amount of drug deposited in the lungs depends on the formulation characteristics and on the aerosolization efficiency of the inhaler. Was the Tobramycin Pulmosphere powder employed? and for the liquid nebulization, which nebuliser was used?
